# Supplementary material for: A Hybrid Finite Element‐Fourier Spectral Method for Vibration Analysis of Structures with Elastic Boundary Conditions
Source: Hindawi journal article supplement (doi:10.1155/2014/834834), 2014-01-01
Supplement: f1 [file 834834.f1.docx]

Appendices

1. Additional Definition in (10)

The **M** and **K** matrix in (10) can be written as follows:

|  | (A.1) |
| --- | --- |
|  |
|  |
|  |
|  |
|  |
|  |
|  |
|  |
|  |

1. Supplemental Definition for (15)

The coupled matrix matrix in (14) can be written as follows:

|  | (B.1) |
| --- | --- |
|  |
|  |
|  |
|  |
|  |
|  |
|  |
|  |
|  |
|  |
|  |
|  |
